# Supplementary material
Source: PubMed Central journal article supplement (PMC3033317)
Supplement: 1019619108_pnas.201019619SI.pdf [file 1019619108_pnas.201019619SI.pdf]

# Supporting Information

Liu et al. 10.1073/pnas.1019619108

## SI Materials and Methods

**Cell Culture and Treatments.** Human embryonic kidney (HEK293T) cells, human lung cancer (H1299) cells, and the human colon cancer cell lines HCT116 (p53<sup>+/+</sup>) and HCT116 (p53<sup>-/-</sup>) cells were maintained in DMEM supplemented with 10% FBS and 100 µg/mL streptomycin-penicillin (HyClone). Cells were treated with Adr, etoposide, cisplatin (Sigma), or UV-C for the indicated times at various concentrations.

**Plasmids Construction.** GST-SIRT1 was constructed by inserting the SIRT1 fragment into vector pGEX-4T3 with *Bam*H1 and *Nor*1. The N terminus of SIRT1 was inserted into vector pGEX-4T3 by using *Bam*H1 and *Mfe*1 (New England Biolabs). The middle fragment and C terminus of SIRT1 were cloned by using primers as follows:

Middle fragment sense: 5' CGCgcatccGATGCTGTGAAAT-TACTGCA 3';

Middle fragment antisense: 5' ATAAGAATgcgccgcGGCA-TATTCACCACCT 3'; C terminus sense: 5' CGCgcatccAA-ACTTTGCTGTAACCCTGT 3';

C terminus antisense: 5' ATAAGAATgcgccgcTGATTTGT-TTGATGGATAGT 3'.

Flag-tagged WT-Set7/9 and H297A were from the W.G. laboratory, and Set7/9 was separately subcloned into pGEX-4T3, EGFP, and pET28 vectors. The substitution mutants of SIRT1 were constructed by using site-directed mutagenesis kit (Stratagene) following manufacturer's instructions.

**Luciferase Assay.** The activity of p53 was determined by a Promega Luciferase Assay System (Promega) as described in ref. 1.

**RNA Interference (RNAi).** Sequences of RNAi oligonucleotides are as follows:

Nonspecific small interfering RNA (siRNA), UUCUCCGA-ACGUGUCACGU

Set7/9 siRNA sense strand: 5'-GGGCACCTGGACGATG-ACGGA-3'

SIRT1 siRNA sense strand: 5'-GTTGGATGATATGACACTG-3'.

All RNAi oligonucleotides were purchased from Shanghai GenePharma Company. These RNAi oligonucleotides were transfected into cells by using the Lipofectamine 2000 transfection kit (Invitrogen) according to the manufacturer's instructions.

**Western Blotting.** Protein expression was detected by Western blotting as described with minor modifications. Equal amounts of proteins (20–150 µg) were size fractionated by 6–15% SDS-polyacrylamide gel electrophoresis. The antibodies used were anti-SIRT1, anti-GAPDH, anti-p53, anti-GFP, anti-Myc, anti-GST (Santa Cruz), anti-Flag (Sigma), anti-Set7/9 (Diagenode), anti-acetyl-lysine (Upstate Biotechnology), anti-pan-methyl-lysine (Abcam), and anti-acetyl-p53 (K382) (Cell Signaling).

**Co-immunoprecipitation.** Cells were harvested and then lysed in lysis buffer (1% Nonidet P-40, 150 mM NaCl, 50 mM Tris at pH 7.5, 5 mM EDTA, 0.05% SDS, 1 mM PMSF, and a 1% mixture of protease inhibitors) on ice for 30 min. After centrifugation at 4 °C at 15,294 × g for 15 min, antibodies were added to the supernatant and rolled at 4 °C overnight. Protein G or A Agarose (GE Healthcare) was then added to the samples, and the samples were rolled at 4 °C for 2 h. After the beads were washed three times with lysis buffer, the pellets were dissolved into 2× SDS loading buffer after centrifugation and boiled at 100 °C for 5 min. Proteins were analyzed by Western blotting with different antibodies.

**RT-PCR and Real-Time PCR.** Total RNA was extracted by TRIzol reagent (Invitrogen) and quantified by spectrophotometer. cDNA was synthesized from 2 µg of RNA with oligo (dT)<sub>18</sub> primers by using Quant Reverse Transcriptase (TIANGEN) and measured by PCR or quantitative real-time PCR. Primers used in this study were purchased from Augct Company.

1. Zhao Y, et al. (2006) Acetylation of p53 at lysine 373/382 by the histone deacetylase inhibitor depsipeptide induces expression of p21<sup>Waf1/Cip1</sup>. *Mol Cell Biol* 26:2782–2790.

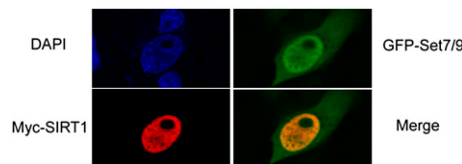

**Fig. S1.** GFP-tagged Set7/9 and Myc-tagged SIRT1 were cotransfected into HEK293T cells, and immunofluorescence was then performed 24 h after the transfection. DAPI, blue color; GFP, green color; Myc, red color; Merge, green and red.

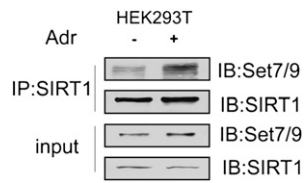

Fig. S2. HEK293T cells were treated with 1  $\mu$ M Adr for 6 h. Cell lysates were prepared for coimmunoprecipitation with anti-SIRT1 and probed with anti-Set7/9.

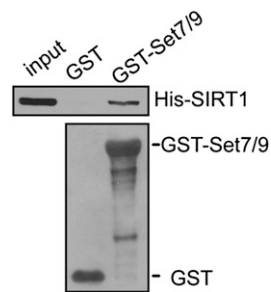

Fig. S3. GST-tagged Set7/9 was used to pull down His-tagged SIRT1 in vitro.

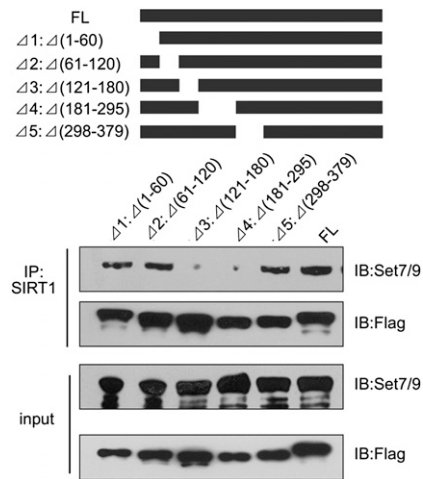

Fig. S4. Full-length or different deletion mutants of Flag-SIRT1 were transfected into HEK293T cells and co-IP was performed with anti-SIRT1. Western blotting was performed by using anti-Set7/9.

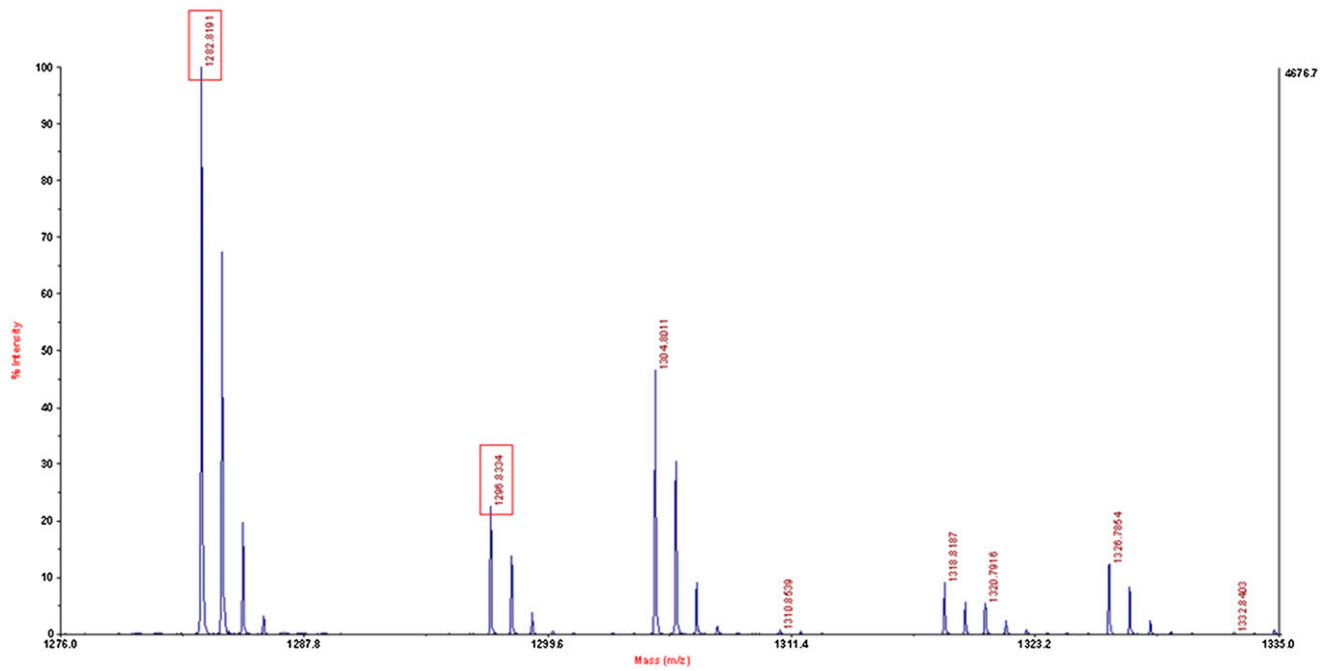

**Fig. S5.** Peptides containing different lysines from the N terminus of SIRT1 were incubated with Set7/9 and subjected to mass spectrometry. Only the peptide containing K233/235/236/238 showed signs of methylation (red frame).
